# Supplementary material for: Development of CO2 phase change absorbents by means of the cosolvent effect
Source: Royal Society of Chemistry journal article supplement (doi:10.1039/c8gc00283e), 2018-01-01
Supplement: c8gc00283e1.pdf [file c8gc00283e1.pdf]

1  
2  
3  
4  
5  
6  
7  
8  
9  
10  
11  
12  
13

## Supporting Information

### **Development of CO<sub>2</sub> phase change absorbents by means of cosolvent effect**

Fushen Yang<sup>1</sup>, Xianhang Jin<sup>2</sup>, Jiawei Fang<sup>1</sup>, Weiwei Tu<sup>1</sup>, Ye Yang<sup>1</sup>, Chunhua Cui<sup>1</sup> and

Weidong Zhang\*<sup>1</sup>

<sup>1</sup>*State Key Laboratory of Chemical Resource Engineering, Beijing Key Laboratory of  
Membrane Science and Technology, Beijing University of Chemical Technology, Beijing, 100029,  
People's Republic of China*

<sup>2</sup>*Sichuan Tianyi Science & Technology Co., Ltd., Chengdu, Sichuan 610225, China*

---

\* Corresponding author. Tel: +86-10-6444-8475; Fax: +86-10-6444-8475; E-mail: [zhangwd@mail.buct.edu.cn](mailto:zhangwd@mail.buct.edu.cn)

14 **1 Distributions of alcohol and CO<sub>2</sub> in two phases**

15 MDEA/1-butanol/H<sub>2</sub>O CPCAs, <sup>1</sup>H NMR analysis was performed. The hydrogen  
 16 atoms in different positions were identified as shown in Table S1. The <sup>1</sup>H NMR  
 17 spectrum of the CPCA after CO<sub>2</sub> absorption was shown in Figure S1. The upper phase  
 18 was CO<sub>2</sub>-lean phase and 1-butanol-rich phase; the lower phase was CO<sub>2</sub>-rich phase  
 19 and 1-butanol-lean phase.

20 Table S1- Identification of hydrogen atoms in the NMR spectra

| Component               | Structure and identification |
|-------------------------|------------------------------|
| MDEA/MDEAH <sup>+</sup> |                              |
| 1-butanol               |                              |
| DMF                     |                              |

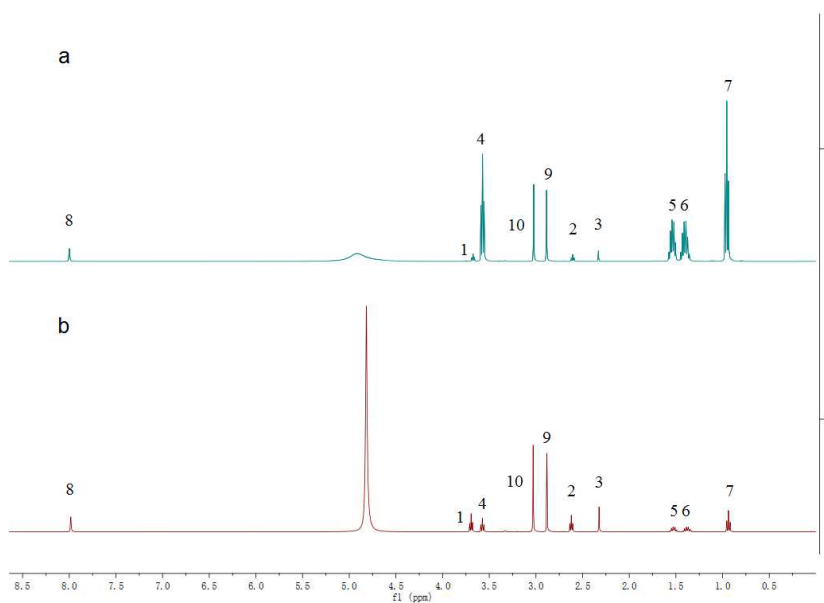

21

22 Fig.S1 <sup>1</sup>H NMR spectrum of the CPCA with 30wt% MDEA and 1-butanol concentration of 43%

23

(a. upper phase; b. lower phase)

24
